# Supplementary material for: Respiratory infections in preterm infants and subsequent asthma: a cohort study
Source: PubMed Central journal article supplement — BMJ Open. 2013 Oct 29;3(10):e004034. doi: 10.1136/bmjopen-2013-004034 (PMC3816244; doi:10.1136/bmjopen-2013-004034), 2013-10-29
Supplement: bmjopen-2013-004034.draft_revisions.pdf [file bmjopen-2013-004034.draft_revisions.pdf]

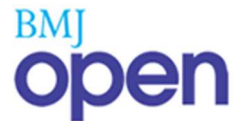

**Respiratory infections in preterm infants and subsequent asthma: a cohort study**

|                                 |                                                                                                                                                                                                                                                                                                                                                                                                                                                                                                                                                                                                                                                                                                                                                       |
|---------------------------------|-------------------------------------------------------------------------------------------------------------------------------------------------------------------------------------------------------------------------------------------------------------------------------------------------------------------------------------------------------------------------------------------------------------------------------------------------------------------------------------------------------------------------------------------------------------------------------------------------------------------------------------------------------------------------------------------------------------------------------------------------------|
| Journal:                        | <i>BMJ Open</i>                                                                                                                                                                                                                                                                                                                                                                                                                                                                                                                                                                                                                                                                                                                                       |
| Manuscript ID:                  | bmjopen-2013-004034                                                                                                                                                                                                                                                                                                                                                                                                                                                                                                                                                                                                                                                                                                                                   |
| Article Type:                   | Research                                                                                                                                                                                                                                                                                                                                                                                                                                                                                                                                                                                                                                                                                                                                              |
| Date Submitted by the Author:   | 15-Sep-2013                                                                                                                                                                                                                                                                                                                                                                                                                                                                                                                                                                                                                                                                                                                                           |
| Complete List of Authors:       | Montgomery, Scott; Örebro University Hospital and Örebro University, Clinical Epidemiology and Biostatistics; Karolinska Institutet, Clinical Epidemiology Unit, Department of Medicine<br>Bahmanyar, Shahram; The Clinical Epidemiology Unit, Karolinska Institutet; The Centre for Pharmacoepidemiology, Karolinska Institutet<br>Brus, Ole; Clinical Epidemiology and Biostatistics, Örebro University Hospital & Örebro University<br>Hussein, Oula; Örebro University Hospital, Clinical Epidemiology and Biostatistics<br>Kosma, Paraskevi; Department of Woman and Child health, Karolinska Institutet; Division of Neonatology, Karolinska hospital<br>Palme-Kilander, Charlotte; Karolinska Institutet, Department of Woman and Child health |
| <b>Primary Subject Heading</b>: | Respiratory medicine                                                                                                                                                                                                                                                                                                                                                                                                                                                                                                                                                                                                                                                                                                                                  |
| Secondary Subject Heading:      | Epidemiology                                                                                                                                                                                                                                                                                                                                                                                                                                                                                                                                                                                                                                                                                                                                          |
| Keywords:                       | Asthma < THORACIC MEDICINE, gestational age, bronchiolitis, cohort study                                                                                                                                                                                                                                                                                                                                                                                                                                                                                                                                                                                                                                                                              |
|                                 |                                                                                                                                                                                                                                                                                                                                                                                                                                                                                                                                                                                                                                                                                                                                                       |

SCHOLARONE™  
Manuscripts

## Respiratory infections in preterm infants and subsequent asthma: a cohort study

Scott Montgomery<sup>123</sup> (scott.montgomery@orebroll.se),  
Shahram Bahmanyar<sup>24</sup> (shahram.bahmanyar@ki.se),  
Ole Brus<sup>1</sup> (ole.brus@orebroll.se),  
Oula Hussein<sup>1</sup> (oula.hussein@orebroll.se),  
Paraskevi Kosma<sup>56</sup> (evaki782002@yahoo.com),  
Charlotte Palme-Kilander<sup>5</sup> (charlotte.palme-kilander@karolinska.se)

1. Clinical Epidemiology and Biostatistics, Örebro University Hospital & Örebro University, Örebro, Sweden.
2. The Clinical Epidemiology Unit, Karolinska Institutet, Stockholm, Sweden.
3. Department of Epidemiology and Public Health, University College London, UK.
4. The Centre for Pharmacoepidemiology, Karolinska Institutet, Stockholm, Sweden.
5. Department of Woman and Child health, Karolinska Institutet, Stockholm, Sweden
6. Division of Neonatology, Karolinska Hospital, Stockholm, Sweden

### Correspondence to:

Prof. Scott Montgomery  
Clinical Epidemiology and Biostatistics  
S-huset  
Örebro University Hospital  
701 85 Örebro  
Sweden

Scott.montgomery@orebroll.se  
Tel: +46 19 602 6210

**Word count** 2356 (main text); 238 (abstract)

**Keywords** gestational age; bronchiolitis; asthma; cohort study

**ABSTRACT**

**Objectives** To investigate if gestational age modifies the association of airway infections that result in hospital admission during the first year after birth, with subsequent asthma risk after age 5 years.

**Setting** Hospital inpatients and a general population comparison group in Sweden followed for subsequent diagnoses in primary and secondary care.

**Participants** National registers identified 42,334 children admitted to hospital for respiratory infection in their first year after birth during 1981-1995, individually matched with 211,594 children not admitted to hospital for infection during their first year.

**Primary outcome** Asthma diagnoses and prescribed asthma treatments after age 5 years identified through registers.

**Results** Cox regression was used to identify a hazard ratio (and 95% confidence interval) of 1.51 (1.47 to 1.51) for the association of respiratory infection before one year of age with asthma after age 5 years, after adjustment for sex, gestational age, chronic lung disease, maternal asthma and maternal smoking. When stratified by gestational age (and with additional adjustment for birth weight), there is statistically significant effect modification by gestational age, with the highest magnitude asthma risk among those born with a gestational age of less than 28 weeks, producing an adjusted hazard ratio of 2.22 (1.59 to 3.09). This higher magnitude asthma risk persisted until after age 10 years, but differences in risk by gestational age were less pronounced for asthma after age 16 years.

**Conclusions** Extremely preterm infants are most likely to have chronic respiratory sequelae following respiratory infections in early life.

1  
2  
3  
4  
5  
6  
7  
8  
9  
10  
11  
12  
13  
14  
15  
16  
17  
18  
19  
20  
21  
22  
23  
24  
25  
26  
27  
28  
29  
30  
31  
32  
33  
34  
35  
36  
37  
38  
39  
40  
41  
42  
43  
44  
45  
46  
47  
48  
49  
50  
51  
52  
53  
54  
55  
56  
57  
58  
59  
60

For peer review only

## STRENGTHS AND LIMITATIONS OF THIS STUDY

### Strengths

- The vast majority of infants admitted to hospital with airway infections in their first year after birth in Sweden during the study period will have been identified.
- The use of prospectively recorded national register data allow for longitudinal analysis of asthma risk, with follow-up into early adulthood.

### Limitations

- The infections are incompletely characterised, particularly during earlier years.
- Asthma was identified based on inpatient diagnoses and prescribed medication, but it was not possible to confirm the accuracy of diagnoses.

## INTRODUCTION

Respiratory infection in the first year after birth<sup>[1-3]</sup>, and preterm birth<sup>[4-7]</sup> are both markers of subsequent asthma risk. How the interrelationship of these factors relates to persistent respiratory disease is incompletely understood.

The lungs of preterm infants are underdeveloped with immature airways and the association of prematurity with later respiratory disease indicates asthma's developmental origin<sup>[8-10]</sup>. Respiratory infections requiring hospital admission during the first year after birth may signal susceptibility to asthma or may be causally implicated in asthma aetiology; and these explanations are not necessarily mutually exclusive. Respiratory infection *epidemics* that produce infections among infants are associated with a raised risk of persistent respiratory disease<sup>[11]</sup>, consistent with a causal explanation for at least a proportion of the association.

Earlier research has demonstrated that degree of prematurity is relevant to risk of persistent asthma and bronchiolitis in the first year<sup>[6]</sup>. This paper investigates whether the *combination*

1  
2  
3 (interaction) of early respiratory infection with prematurity, when the immature lungs may  
4  
5 be particularly susceptible to long-term damage, represents a disproportionately raised risk  
6  
7 for persistent respiratory disease. Swedish general population registers were used to identify  
8  
9 a cohort of children who were admitted to hospital due to respiratory infection in their first  
10  
11 year after birth and they were matched with a cohort of children not admitted to hospital  
12  
13 for infection in their first year.  
14  
15  
16  
17  
18  
19  
20  
21  
22  
23

## 24 **METHODS**

25  
26 All children in Sweden admitted to hospital for severe infections that affect the airways in  
27  
28 the 12 months following birth between 1981 and 1995 were identified (N=4233). They were  
29  
30 individually matched with children who were not admitted to hospital for these infections in  
31  
32 their first year (N=211594), with matching for gestational age, region of birth, and the month  
33  
34 and year of their birth. Each exposed child was matched with five unexposed children,  
35  
36 selected at random from among those with relevant characteristics. If fewer than five  
37  
38 unexposed infants were available for matching with an exposed subject, all suitable children  
39  
40 were selected. Follow-up to identify chronic airway disease (asthma) was up to 2010.  
41  
42  
43  
44  
45  
46  
47

## 48 **Registers**

49  
50 This study utilised national Swedish register data that can be linked at the individual level  
51  
52 using the unique personal identity number issued to all residents. Information on pregnancy  
53  
54 and delivery, and other characteristics of mother and baby were obtained through the  
55  
56 Medical Birth Register, which has recorded almost every delivery in Sweden since 1973. The  
57  
58  
59  
60

1  
2  
3 Patient Register has had complete national coverage of inpatient diagnoses since 1987 and  
4  
5 included outpatient diagnoses since 2000. The Prescription Register has provided  
6  
7 information on all prescribed medication since 2005.  
8  
9

### 10 11 12 **Measures**

13  
14 The Patient Register was used to identify respiratory infections in the first year after birth  
15  
16 that resulted in hospital admission; and these diagnoses are listed in Table 1. This register  
17  
18 also identified diagnoses of lung disease through ICD codes consistent with asthma in  
19  
20 children and young adults. To avoid surveillance bias (incidental reporting of asthma in  
21  
22 children admitted or investigated for other diseases) asthma was only defined as the  
23  
24 outcome here when it was the sole diagnosis made at the hospital visit. The Prescription  
25  
26 Register – which records all treatments dispensed through pharmacies (including all  
27  
28 prescriptions from primary care) was used to identify pharmaceutical treatments for asthma  
29  
30 in children and young adults and the selected treatments are presented in table 1. The  
31  
32 Medical Birth Register provided information on gestational age, birth weight, maternal age  
33  
34 at delivery, maternal smoking during pregnancy, maternal asthma, sex of the child, parity  
35  
36 and a diagnosis of neonatal chronic lung disease (CLD: ICD-8 776.6 and ICD-9 770H): these  
37  
38 measures were categorised as presented in table 2.  
39  
40  
41  
42  
43  
44  
45  
46  
47

### 48 **Statistical analysis**

49  
50 Cox regression was used to estimate hazard ratios associated with asthma after 5 years of  
51  
52 age (hospital diagnosis or treatment), with follow-up to first asthma event, exit from the  
53  
54 study population or end of the study period, whichever came first. The following  
55  
56 independent measures were also included in models individually, then mutually adjusted for  
57  
58  
59  
60

1  
2  
3 each other: respiratory infection in the first year after birth, gestational age, sex, maternal  
4  
5 age at delivery, parity, maternal smoking, a maternal diagnosis of asthma, CLD and year of  
6  
7 delivery (all modelled as series of binary dummy variables in the categories shown in tables 2  
8  
9 and 3). The non-stratified models (table 3) were not adjusted for birth weight, as it was  
10  
11 collinear with gestational age while the stratified models (tables 4 and 5) and interaction  
12  
13 tests were adjusted for a continuous measure of birth weight. Log-minus-log plots were  
14  
15 used to assess whether the proportional hazards assumption was violated: the curves  
16  
17 comparing the exposed and unexposed cohorts did not converge and proportionality was  
18  
19 maintained.  
20  
21  
22  
23  
24  
25

26 The main analysis concerns the *combination* of early infection with gestational age and this  
27  
28 was investigated in models for the association of first-year infection with asthma after age 5  
29  
30 years, stratified by gestational age, with adjustment for all of the potential confounding  
31  
32 factors described above, with the addition of birth weight modelled as a continuous  
33  
34 measure. To assess effect modification by gestational age for the association of early  
35  
36 infection with asthma, interaction testing using the entire (non-stratified) study population  
37  
38 was undertaken. The interaction terms for gestational age (categorical) by infection were  
39  
40 adjusted for the main effect (gestational age and infection), as well as for all of the  
41  
42 previously described potential confounding factors.  
43  
44  
45  
46  
47  
48  
49

50 To assess whether the combination of prematurity with first year infection is a risk for  
51  
52 asthma that persists beyond early childhood, the above analysis stratified for gestational age  
53  
54 was repeated, but with truncated follow-up to identify asthma after age 10 years and after  
55  
56 age 16 years.  
57  
58  
59  
60



1  
2  
3  
4  
5 SPSS software was used and statistical significance was defined as confidence intervals that  
6  
7 do not include 1.00 and p values below 0.05.  
8  
9

## 10 11 12 **RESULTS**

13  
14 As the two cohorts were matched, the distributions for gestational age and year of birth are  
15 almost identical (table 2). This matching is also reflected in the very similar distributions for  
16 birth weight. Children admitted to hospital with infections were more often male and their  
17 mothers were more likely to be younger, smokers, with a diagnosis of asthma and to have  
18 had a greater number of previous pregnancies. CLD was also more common in the infection  
19 cohort, particularly among the extremely preterm infants (12.3% compared with 7.9%  
20 among the extremely preterm).  
21  
22  
23  
24  
25  
26  
27  
28  
29  
30  
31  
32

33 Respiratory infection during the first year is statistically significantly associated with a raised  
34 risk of asthma after age 5 years, both before and after adjustment for potential confounding  
35 factors (table 3). Female sex, neonatal lung disease, maternal asthma, fewer previous  
36 pregnancies are associated with a statistically significant raised asthma risk in the adjusted  
37 model. Gestational age was a matching characteristic, so associations with this measure are  
38 not presented.  
39  
40  
41  
42  
43  
44  
45  
46  
47  
48  
49

50 Table 4 shows the association of hospital admission for infection in the first year with  
51 asthma after age 5 years, *stratified by gestational age*. Infection is associated with asthma  
52 across all of the gestational age groups after adjustment for potential confounding factors.  
53  
54  
55  
56  
57 The highest magnitude association is among the most preterm infants. A notably raised risk  
58  
59  
60

1  
2  
3 was also observed among those with uncertain gestational age. Interaction testing among  
4  
5 the entire study population confirms statistically significant effect modification by the most  
6  
7 premature gestational age group, at less than 28 weeks compared with the infants who were  
8  
9 born at term. The interaction results were not statistically significant for the other  
10  
11 gestational age groups, including where it was unspecified. After adjustment for the main  
12  
13 effects the hazard ratio (and 95% confidence interval) is 1.41 (1.02 to 1.95; p for  
14  
15 interaction=0.034) and with additional adjustment for the potential confounding factors it is  
16  
17 1.40 (1.01 to 1.93; p for interaction=0.042).  
18  
19  
20  
21  
22  
23

24 Early Infection is associated with asthma after age 10 and after age 16 years for all  
25  
26 gestational age groups, but although still statistically significant, the notably increased  
27  
28 magnitude for the most premature is somewhat reduced after age 16 years (table 5).  
29  
30  
31  
32

33 The analysis was repeated excluding those with missing maternal smoking information and  
34  
35 the results were not notably altered (data not shown).  
36  
37  
38  
39

## 40 **DISCUSSION**

41  
42 In this register-based cohort study, hospital admission for respiratory infection in the 12  
43  
44 months following birth was associated with an increased risk of asthma after age 5 years,  
45  
46 particularly among those born extremely prematurely.  
47  
48  
49  
50

51  
52 Another study using Swedish register data found that early infection and prematurity were  
53  
54 independently associated with later increased corticosteroid use<sup>[6]</sup>. While the results  
55  
56 between the earlier study and ours are similar for associations with infection, the cohorts in  
57  
58  
59  
60

1  
2  
3 our study were matched for gestational age, which was considered as a potential modifying  
4  
5 factor for the effect of early infections. Here, asthma after age 5 years was identified  
6  
7 through prescribed corticosteroids and other asthma medication, as well as inpatient or  
8  
9 outpatient hospital diagnoses. We used several strategies to ensure that the associations  
10  
11 are with asthma rather than other comorbidity associated with prematurity and early  
12  
13 infection. Only diagnoses of asthma made after age 5 years were included, as these are more  
14  
15 likely to represent persistent asthma. We limited diagnoses to instances where asthma was  
16  
17 the sole diagnosis recorded by the outpatient or inpatient discharge summary to minimise  
18  
19 surveillance bias, where admission for another condition results in an incidental diagnosis of  
20  
21 asthma: this can produce a conservative estimate of association. While it can be difficult to  
22  
23 differentiate between the effects of infection and susceptibility to infection, we attempted  
24  
25 to tackle this through adjustment for a variety of potential confounding factors, including  
26  
27 birth weight within gestational age categories to provide fine-grain control for foetal  
28  
29 development. The extremely preterm infants more often had CLD, possibly signalling to both  
30  
31 susceptibility to early infection and also asthma: we therefore adjusted for neonatal CLD.  
32  
33  
34  
35  
36  
37  
38  
39  
40  
41  
42  
43  
44  
45  
46  
47  
48  
49  
50  
51  
52  
53  
54  
55  
56  
57  
58  
59  
60

This study has some potential limitations. Identification of asthma through registers does not  
provide information about disease phenotype, including whether allergic sensitisation is  
implicated and confirmation of individual diagnoses is not possible. The infections defining  
the exposed cohort are not always well characterised (particularly from the earlier periods),  
but all will affect the lungs and were sufficiently serious to result in hospital admission. Prior  
to 1990, respiratory syncytial virus (RSV) was often diagnosed as an unspecified viral  
infection, so we included some non-specific infections. Earlier studies found that RSV was  
responsible for the majority of bronchiolitis diagnoses during the first year after birth<sup>[12 13]</sup>,

1  
2  
3 while rhinovirus was associated with 18% of bronchiolitis diagnoses, although hospital  
4 admission was less common<sup>[14]</sup>. It is possible that use of more specific diagnoses, not  
5 available through the Patient Register, would result in higher magnitude associations. We  
6 were unable to examine delivery mode as a potential confounding factor as this was not  
7 available in our data set: caesarean section has been linked with an increased asthma risk in  
8 term infants<sup>[15]</sup>. Number of older siblings is an important indicator of asthma risk. While this  
9 was not measured directly, we adjusted for parity as a reliable indicator of number of older  
10 siblings. Also, it has been hypothesised that previous pregnancies – directly measured by  
11 parity - may influence immune-mediated disease risk through changes in the mother's  
12 immune profile<sup>[16]</sup>. The measure of maternal smoking was incomplete as it was not always  
13 included in the Medical Birth Register. The proportions without smoking data were almost  
14 identical in both the exposed and unexposed cohorts. When the analysis was restricted to  
15 mothers with complete smoking data, the results were not materially altered. Our study will  
16 have underestimated the total number of asthma diagnoses, as we did not have data from  
17 primary care, and because we excluded asthma with comorbid diagnoses to avoid  
18 confounding by comorbidity. The use of prescribed medication will have improved our ability  
19 to identify chronic asthma as this will identify those diagnosed and treated in primary care.  
20 The two strategies to identify asthma were combined to maximise reliable asthma  
21 identification and statistical power. Unavoidably, gestational age was unavailable for some  
22 infants: the higher magnitude asthma risk associated with infections in this group may be  
23 due to a proportion who were also very premature, and possibly other risks. As interaction  
24 testing by gestational age was undertaken, adjustment rather than internal stratification for  
25 this factor was performed. Despite this, use of a matching characteristic may still have  
26 resulted in underestimation of interaction effects between infection and gestational age.  
27  
28  
29  
30  
31  
32  
33  
34  
35  
36  
37  
38  
39  
40  
41  
42  
43  
44  
45  
46  
47  
48  
49  
50  
51  
52  
53  
54  
55  
56  
57  
58  
59  
60

1  
2  
3  
4  
5 Both RSV and rhinovirus infections in infancy have been linked with subsequent childhood  
6 wheezing<sup>[1 3]</sup>, but the association of early life infections with allergy and possible asthma risk  
7 has a complicated pattern. While some markers of infection, such as positive serology for  
8 Epstein-Barr virus (EBV) and cytomegalovirus (CMV) are associated with a reduced risk of  
9 allergic sensitisation<sup>[17]</sup>, there is evidence that early infection with RSV may increase the risk  
10 of allergic asthma through its influence on regulatory T-cell function<sup>[18]</sup>. However, pre-  
11 existing atopy – or associated characteristics - may also influence subsequent infection risk,  
12 as rhinovirus bronchiolitis has been found to occur more frequently in infants who had prior  
13 allergic sensitization<sup>[19]</sup>. Whether or not allergy is implicated, respiratory infections in  
14 infancy, both RSV and non-RSV infections, are thought to contribute to airway impairment<sup>[3</sup>  
15 20-23]. The possible non-mutually exclusive mechanisms include through structural  
16 damage<sup>[24]</sup>, modification of the mucosal immunology of the lungs<sup>[25]</sup> or through epigenetic  
17 changes<sup>[26]</sup>. Treatment of infections by antibiotics has been suggested as a risk for asthma,  
18 but the evidence is weak; and reviews suggest that the association is due to confounding by  
19 indication.

20  
21  
22  
23  
24  
25  
26  
27  
28  
29  
30  
31  
32  
33  
34  
35  
36  
37  
38  
39  
40  
41  
42  
43 Lung development continues throughout foetal life and babies who are born prematurely  
44 have developmental deficits of airway<sup>[27-30]</sup> and may result in chronic asthma<sup>[8]</sup>, which can  
45 diminish with increasing age as lung function improves<sup>[31 32]</sup>. Atopic sensitization – and thus  
46 allergic asthma that may be more persistent in adulthood - is less common in those born  
47 preterm compared with term deliveries<sup>[33]</sup>. Thus, the combination of early infection and  
48 prematurity may conspire to increase both allergic and non-allergic risks for asthma, helping  
49 to explain the multiplicative effect of this combination of exposures for the risk of  
50  
51  
52  
53  
54  
55  
56  
57  
58  
59  
60

1  
2  
3 subsequent asthma. The notably higher risk of asthma associated with this exposure  
4  
5 combination continues throughout childhood, but appears to be less profound after age 16  
6  
7 years, possibly reflecting age-associated changes.  
8  
9

10  
11  
12 This study provides evidence that respiratory infections resulting in hospital admission  
13  
14 during the first year after birth are a risk for subsequent asthma after age 5 years. The  
15  
16 increase in childhood asthma risk is particularly high among extremely preterm infants.  
17  
18  
19  
20  
21  
22  
23  
24  
25  
26  
27  
28  
29  
30  
31  
32  
33  
34  
35  
36  
37  
38  
39  
40  
41  
42  
43  
44  
45  
46  
47  
48  
49  
50  
51  
52  
53  
54  
55  
56  
57  
58  
59  
60

### What is already known on this subject

- Infants born preterm have an increased risk of airway disease and subsequent childhood asthma.
- Respiratory infection in infancy is also associated with an increased risk of childhood asthma, independent of gestational age.

### What this study adds

- Extremely premature infants who experience respiratory infections before one year of age have an even higher increase in risk of subsequent asthma than term infants.

**Funding** The study was supported by the Abbvie Research Fund and Örebro University strategic funding.

**Contributors** SM and CPK conceived the study and prepared the first draft of the manuscript; and with SB they developed the methods. SB and PK were responsible for obtaining and preparing the data. OB and OH conducted the statistical analysis and produced the tables. All authors were involved in critical editing of the manuscript.

**Competing interests** None.

**Ethics approval** Karolinska Regional Ethics Committee, Stockholm

Data sharing: We do not have ethical permission to share the data, however they are register data and available to other academic researchers.

## REFERENCES

1. Sigurs N, Aljassim F, Kjellman B, et al. Asthma and allergy patterns over 18 years after severe RSV bronchiolitis in the first year of life. *Thorax* 2010;**65**(12):1045-52.
2. Hyvarinen MK, Kotaniemi-Syrjanen A, Reijonen TM, et al. Lung function and bronchial hyper-responsiveness 11 years after hospitalization for bronchiolitis. *Acta Paediatr* 2007;**96**(10):1464-9.
3. Jackson DJ, Gangnon RE, Evans MD, et al. Wheezing rhinovirus illnesses in early life predict asthma development in high-risk children. *Am J Respir Crit Care Med*. 2008;**178**(7):667-72.
4. Kallen B, Finnstrom O, Nygren KG, et al. Association between preterm birth and intrauterine growth retardation and child asthma. *Eur Respir J* 2013;**41**(3):671-6.
5. Vrijlandt EJ, Kerstjens JM, Duiverman EJ, et al. Moderately Preterm Children Have More Respiratory Problems during Their First 5 Years of Life Than Children Born Full Term. *Am J Respir Crit Care Med* 2013;**187**(11):1234-40.
6. Vogt H, Lindstrom K, Braback L, et al. Preterm birth and inhaled corticosteroid use in 6- to 19-year-olds: a Swedish national cohort study. *Pediatrics* 2011;**127**(6):1052-9.
7. Doyle LW. Respiratory function at age 8-9 years in extremely low birthweight/very preterm children born in Victoria in 1991-1992. *Pediatr Pulmonol* 2006;**41**(6):570-6.
8. Fawke J, Lum S, Kirkby J, et al. Lung function and respiratory symptoms at 11 years in children born extremely preterm: the EPICure study. *Am J Respir Crit Care Med* 2010;**182**(2):237-45.
9. Jaakkola JJ, Ahmed P, Ieromnimon A, et al. Preterm delivery and asthma: a systematic review and meta-analysis. *J Allergy Clin Immunol* 2006;**118**(4):823-30.
10. Greenough A. Long-term pulmonary outcome in the preterm infant. *Neonatology* 2008;**93**(4):324-7.
11. Wu P, Hartert TV. Evidence for a causal relationship between respiratory syncytial virus infection and asthma. *Expert Rev Anti Infect Ther* 2011;**9**(9):731-45.
12. Broughton S, Roberts A, Fox G, et al. Prospective study of healthcare utilisation and respiratory morbidity due to RSV infection in prematurely born infants. *Thorax* 2005;**60**(12):1039-44.
13. Wickman M, Farahmand BY, Persson PG, et al. Hospitalization for lower respiratory disease during 20 yrs among under 5 yr old children in Stockholm County: a population based survey. *Eur Respir J* 1998;**11**(2):366-70.
14. Miller EK, Williams JV, Gebretsadik T, et al. Host and viral factors associated with severity of human rhinovirus-associated infant respiratory tract illness. *J Allergy Clin Immunol* 2011;**127**(4):883-91.
15. Almqvist C, Cnattingius S, Lichtenstein P, et al. The impact of birth mode of delivery on childhood asthma and allergic diseases--a sibling study. *Clin Exp Allergy* 2012;**42**(9):1369-76.
16. Amoudruz P, Holmlund U, Schollin J, et al. Maternal country of birth and previous pregnancies are associated with breast milk characteristics. *Pediatr Allergy Immunol* 2009;**20**(1):19-29.



17. Nilsson C, Linde A, Montgomery SM, et al. Does early EBV infection protect against IgE sensitization? *J Allergy Clin Immunol* 2005;**116**(2):438-44.
18. Krishnamoorthy N, Khare A, Oriss TB, et al. Early infection with respiratory syncytial virus impairs regulatory T cell function and increases susceptibility to allergic asthma. *Nat Med* 2012;**18**(10):1525-30.
19. Jackson DJ, Evans MD, Gangnon RE, et al. Evidence for a causal relationship between allergic sensitization and rhinovirus wheezing in early life. *Am J Respir Crit Care Med* 2012;**185**(3):281-5.
20. Fjaerli HO, Farstad T, Rod G, et al. Acute bronchiolitis in infancy as risk factor for wheezing and reduced pulmonary function by seven years in Akershus County, Norway. *BMC Pediatr* 2005;**5**:31.
21. Romero JR, Stewart DL, Buysman EK, et al. Serious early childhood wheezing after respiratory syncytial virus lower respiratory tract illness in preterm infants. *Clin Ther* 2010;**32**(14):2422-32.
22. Koponen P, Helminen M, Paassilta M, et al. Preschool asthma after bronchiolitis in infancy. *Eur Respir J* 2012;**39**(1):76-80.
23. Mikalsen IB, Halvorsen T, Oymar K. The outcome after severe bronchiolitis is related to gender and virus. *Pediatr Allergy Immunol* 2012;**23**(4):391-8.
24. Benjamin JT, Carver BJ, Plosa EJ, et al. NF-kappaB activation limits airway branching through inhibition of Sp1-mediated fibroblast growth factor-10 expression. *J Immunol* 2010;**185**(8):4896-903.
25. Han J, Takeda K, Gelfand EW. The Role of RSV Infection in Asthma Initiation and Progression: Findings in a Mouse Model. *Pulm Med* 2011;**2011**:748038.
26. Joss-Moore LA, Lane RH. Epigenetics and the developmental origins of disease: the key to unlocking the door of personalized medicine. *Epigenomics* 2012;**4**(5):471-3.
27. Hjalmarson O, Sandberg K. Abnormal lung function in healthy preterm infants. *Am J Respir Crit Care Med* 2002;**165**(1):83-7.
28. Friedrich L, Pitrez PM, Stein RT, et al. Growth rate of lung function in healthy preterm infants. *Am J Respir Crit Care Med* 2007;**176**(12):1269-73.
29. Boyle EM, Poulsen G, Field DJ, et al. Effects of gestational age at birth on health outcomes at 3 and 5 years of age: population based cohort study. *BMJ* 2012;**344**:e896.
30. Kotecha SJ, Watkins WJ, Paranjothy S, et al. Effect of late preterm birth on longitudinal lung spirometry in school age children and adolescents. *Thorax* 2012;**67**(1):54-61.
31. Narang I, Rosenthal M, Cremonesini D, et al. Longitudinal evaluation of airway function 21 years after preterm birth. *Am J Respir Crit Care Med* 2008;**178**(1):74-80.
32. Crump C, Winkleby MA, Sundquist J, et al. Risk of asthma in young adults who were born preterm: a Swedish national cohort study. *Pediatrics* 2011;**127**(4):e913-20.
33. Siltanen M, Wehkalampi K, Hovi P, et al. Preterm birth reduces the incidence of atopy in adulthood. *J Allergy Clin Immunol* 2011;**127**(4):935-42.

**Table 1. Respiratory infections and prescribed asthma treatments**

| <b>Respiratory infections during the first year of life</b> |                                                             |
|-------------------------------------------------------------|-------------------------------------------------------------|
| Adenovirus infection                                        | Pneumococcal pneumonia                                      |
| Other specified Adenovirus infection                        | Pneumonia                                                   |
| Bordetella Pertussis                                        | Pneumonia due to streptococcus                              |
| Bronchitis                                                  | Pneumonia due to Haemophilus influenzae                     |
| Bronchiolitis                                               | Pneumonia due to respiratory syncytial virus                |
| Bronchopneumonia organism unspecified                       | Other unspecified pneumonia                                 |
| Coxsackie virus infection                                   | Bacterial pneumonia unspecified                             |
| Cytomegalovirus                                             | Other specified viral pneumonia                             |
| Echo virus infection                                        | Pneumonia in other infectious diseases classified elsewhere |
| Influenza                                                   | Rhinovirus infection                                        |
| Influenza with other respiratory manifestations             | Other specified viral infections                            |
| Influenza unspecified                                       | Suspected viral infections                                  |
| Influenza with pleuropneumonia                              | Unspecified viral infections                                |
| <b>Prescribed treatments</b>                                |                                                             |
| Beclomethasone                                              | Omalizumab                                                  |
| Budesonide                                                  | Salbutamol                                                  |
| Flutikasone                                                 | Salmeterol                                                  |
| Formoterol                                                  | Sodiumchromoglicate                                         |
| Indakaterol                                                 | Terbutaline                                                 |
| Ipratropium                                                 | Theophylline                                                |
| Mometasone                                                  | Tiotropium bromide                                          |
| Montelukast                                                 |                                                             |

**Table 2. Characteristics of the cohorts defined by respiratory infection during the first year of life**

|                               | Respiratory infection in first year | No respiratory infection in first year | Total            |
|-------------------------------|-------------------------------------|----------------------------------------|------------------|
|                               | n= 42334 (16.7%)                    | n= 211594 (83.3%)                      | n= 253928 (100%) |
| Prescribed asthma medication* | 7485 (17.7)                         | 26591 (12.6)                           | 34076 (13.4)     |
| Hospital asthma diagnosis*    | 420 (1.0)                           | 761 (0.4)                              | 1181 (0.5)       |
| No asthma*                    | 34749 (82.1)                        | 184775 (87.3)                          | 219524 (86.5)    |
| Gestational age (weeks)       |                                     |                                        |                  |
| ≤27                           | 252 (0.6)                           | 1221 (0.6)                             | 1473 (0.6)       |
| 28-31                         | 723 (1.7)                           | 3578 (1.7)                             | 4301 (1.7)       |
| 32-36                         | 3906 (9.2)                          | 19528 (9.2)                            | 23434 (9.2)      |
| 37- 41                        | 34839 (82.3)                        | 174194 (82.3)                          | 209033 (82.3)    |
| > 41                          | 2507 (5.9)                          | 12535 (5.9)                            | 15042 (5.9)      |
| Uncertain                     | 107 (0.3)                           | 538 (0.3)                              | 645 (0.3)        |
| Birth weight                  |                                     |                                        |                  |
| <1000g                        | 241(0.6)                            | 1292 (0.6)                             | 1533 (0.6)       |
| > 1000-1500g                  | 580 (1.4)                           | 2714 (1.3)                             | 3294 (1.3)       |
| >1500-2000g                   | 953 (2.3)                           | 4300 (2.0)                             | 5253 (2.1)       |
| >2000-2750g                   | 4099 (9.7)                          | 18815 (8.9)                            | 22914 (9.0)      |
| >2750-3250g                   | 9727 (23.0)                         | 47617 (22.5)                           | 57344 (22.6)     |
| >3250-4000g                   | 20178 (47.7)                        | 104693 (49.5)                          | 124871 (49.2)    |
| > 4000g                       | 6426 (15.2)                         | 31524 (14.9)                           | 37950 (14.9)     |
| Not recorded                  | 130 (0.3)                           | 639 (0.3)                              | 769 (0.3)        |
| Maternal asthma               |                                     |                                        |                  |
| Current                       | 721 (1.7)                           | 2754 (1.3)                             | 3475 (1.4)       |
| Previous                      | 210 (0.5)                           | 749 (0.4)                              | 959 (0.4)        |
| None                          | 41403 (97.8)                        | 208091 (98.3)                          | 249494 (98.3)    |
| Maternal age at delivery      |                                     |                                        |                  |
| 13-18                         | 755 (1.8)                           | 2917 (1.4)                             | 3672 (1.5)       |
| 19-25                         | 14230 (33.6)                        | 66604 (31.5)                           | 80834 (31.8)     |
| 26-30                         | 15312 (36.2)                        | 76752 (36.3)                           | 92064 (36.3)     |
| 31-35                         | 8911 (21.0)                         | 46336 (21.9)                           | 55247 (21.8)     |
| 36-40                         | 2757 (6.5)                          | 16673 (7.9)                            | 19430 (7.7)      |
| 41-54                         | 369 (0.9)                           | 2312 (1.1)                             | 2681 (1.1)       |
| Maternal smoking              |                                     |                                        |                  |
| Non-smoker                    | 23871 (56.4)                        | 134802 (63.7)                          | 158673 (62.5)    |
| Smoker                        | 12429 (29.4)                        | 46817 (22.1)                           | 59246 (23.3)     |
| Not recorded                  | 6034 (14.3)                         | 29975 (14.2)                           | 36009 (14.2)     |
| Child's sex                   |                                     |                                        |                  |
| Female                        | 17619 (41.6)                        | 103007 (48.7)                          | 120626 (47.5)    |
| Male                          | 24715 (58.4)                        | 108587 (51.3)                          | 133302 (52.5)    |
| Parity                        |                                     |                                        |                  |
| 1                             | 12714 (30.0)                        | 87275 (41.2)                           | 99989 (39.4)     |
| 2                             | 17247 (40.7)                        | 74534 (35.2)                           | 91781 (36.1)     |
| 3                             | 8270 (19.5)                         | 34880 (16.5)                           | 43150 (17.0)     |
| 4 or more                     | 4103 (9.7)                          | 14905 (7.0)                            | 19008 (7.5)      |
| Chronic lung disease          |                                     |                                        |                  |
| No                            | 42272 (99.9)                        | 211416 (99.9)                          | 253688 (99.9)    |
| Yes                           | 62 (0.1)                            | 178 (0.1)                              | 240 (0.1)        |

\* These categories are not mutually exclusive.

**Table 3. Early life characteristics and subsequent asthma risk after age 5 years**

| Characteristic                      | Asthma<br>n (%) | No asthma<br>n (%) | Unadjusted HR<br>(95% CI) | P value | Adjusted <sup>1</sup> HR<br>(95% CI) | P value |
|-------------------------------------|-----------------|--------------------|---------------------------|---------|--------------------------------------|---------|
| Respiratory infection in first year |                 |                    |                           |         |                                      |         |
| Yes                                 | 7585 (17.9)     | 34749 (82.1)       | 1.45 (1.41 to 1.49)       | <0.001  | 1.51 (1.47 to 1.54)                  | <0.001  |
| No                                  | 26819 (12.7)    | 184775 (87.3)      | Ref.                      |         | Reference                            |         |
| Maternal asthma                     |                 |                    |                           |         |                                      |         |
| Current                             | 921 (26.5)      | 2554 (73.5)        | 3.86 (3.61 to 4.12)       | <0.001  | 1.94 (1.82 to 2.08)                  | <0.001  |
| Previous                            | 222 (23.1)      | 737 (76.9)         | 3.05 (2.67 to 3.48)       | <0.001  | 1.38 (1.21 to 1.58)                  | <0.001  |
| None                                | 33261 (13.3)    | 216233 (86.7)      | Ref.                      |         | Ref.                                 |         |
| Maternal age at delivery (years)    |                 |                    |                           |         |                                      |         |
| 13-18                               | 517 (14.1)      | 3155 (85.9)        | 0.96 (0.88 to 1.05)       | 0.372   | 0.98 (0.90 to 1.07)                  | 0.625   |
| 19-25                               | 11451 (14.2)    | 69383 (85.8)       | 1.02 (1.00 to 1.05)       | 0.069   | 1.03 (1.00 to 1.06)                  | 0.026   |
| 26-30                               | 12249 (13.3)    | 79815 (86.7)       | Ref.                      |         | Ref.                                 |         |
| 31-35                               | 7276 (13.2)     | 47971 (86.8)       | 0.99 (0.96 to 1.02)       | 0.490   | 1.02 (0.99 to 1.05)                  | 0.140   |
| 36-40                               | 2562 (13.2)     | 16868 (86.8)       | 1.00 (0.96 to 1.05)       | 0.830   | 1.05 (1.01 to 1.10)                  | 0.029   |
| 41-54                               | 349 (13.0)      | 2332 (87.0)        | 1.00 (0.90 to 1.12)       | 0.934   | 1.05 (0.94 to 1.17)                  | 0.391   |
| Maternal smoking                    |                 |                    |                           |         |                                      |         |
| Non-smoker                          | 21701 (13.7)    | 136972 (86.3)      | Ref.                      |         | Ref.                                 |         |
| Smoker                              | 8278 (14.0)     | 50968 (86.0)       | 0.93 (0.91 to 0.96)       | <0.001  | 1.01 (0.99 to 1.04)                  | 0.380   |
| Not recorded                        | 4425 (12.3)     | 31584 (87.7)       | 0.59 (0.57 to 0.61)       | <0.001  | 0.90 (0.87 to 0.93)                  | <0.001  |
| Child's sex                         |                 |                    |                           |         |                                      |         |
| Female                              | 18150 (15.0)    | 102476 (85.0)      | 1.25 (1.22 to 1.27)       | <0.001  | 1.27 (1.24 to 1.29)                  | <0.001  |
| Male                                | 16254 (12.2)    | 117048 (87.8)      | Ref.                      |         | Ref.                                 |         |
| Parity                              |                 |                    |                           |         |                                      |         |
| 1                                   | 14371 (14.4)    | 85618 (85.6)       | Ref.                      |         | Ref.                                 |         |
| 2                                   | 12230 (13.3)    | 79551 (86.7)       | 0.93 (0.90 to 0.95)       | <0.001  | 0.90 (0.88 to 0.93)                  | <0.001  |
| 3                                   | 5437 (12.6)     | 37713 (87.4)       | 0.87 (0.84 to 0.89)       | <0.001  | 0.84 (0.82 to 0.87)                  | <0.001  |
| 4 or more                           | 2366 (12.4)     | 16642 (87.6)       | 0.88 (0.84 to 0.92)       | <0.001  | 0.81 (0.78 to 0.85)                  | <0.001  |
| Chronic lung disease                |                 |                    |                           |         |                                      |         |
| No                                  | 34360           | 219328             | Ref.                      |         | Ref.                                 |         |
| Yes                                 | 44              | 196                | 1.59 (1.18 to 2.14)       | 0.002   | 1.44 (1.06 to 1.96)                  | 0.019   |

<sup>1</sup> Adjusted for child's sex, maternal asthma, maternal age at delivery, year of birth, maternal smoking, gestational age, infection during first year of life, parity, and chronic lung disease

**Table 4. Respiratory infection in the first year of life subsequent asthma risk after age 5 years, stratified by gestational age**

| Infection stratified by gestational age | Asthma n (%) | No asthma n (%) | HR (95% CI)         | P Value | HR <sup>1</sup> (95% CI) | P Value |
|-----------------------------------------|--------------|-----------------|---------------------|---------|--------------------------|---------|
| <b>Week 0-27</b>                        |              |                 |                     |         |                          |         |
| Infection                               | 52 (20.6)    | 200 (79.4)      | 2.03 (1.47 to 2.80) | < 0.001 | 2.22 (1.59 to 3.09)      | < 0.001 |
| No infection                            | 130 (10.6)   | 1091 (89.4)     | Ref.                |         | Ref.                     |         |
| <b>Week 28-31</b>                       |              |                 |                     |         |                          |         |
| Infection                               | 132 (18.3)   | 591 (81.7)      | 1.47 (1.21 to 1.78) | < 0.001 | 1.57 (1.29 to 1.92)      | < 0.001 |
| No infection                            | 458 (12.8)   | 3130 (87.2)     | Ref.                |         | Ref.                     |         |
| <b>Week 32-36</b>                       |              |                 |                     |         |                          |         |
| Infection                               | 738 (18.9)   | 3168 (81.1)     | 1.47 (1.35 to 1.59) | < 0.001 | 1.54 (1.42 to 1.68)      | < 0.001 |
| No infection                            | 2588 (13.3)  | 16940 (86.7)    | Ref.                |         | Ref.                     |         |
| <b>Week 37-41</b>                       |              |                 |                     |         |                          |         |
| Infection                               | 6194 (17.8)  | 28645 (82.2)    | 1.44 (1.40 to 1.48) | < 0.001 | 1.49 (1.45 to 1.53)      | < 0.001 |
| No infection                            | 22075 (12.7) | 152119 (87.3)   | Ref.                |         | Ref.                     |         |
| <b>Week &gt; 41</b>                     |              |                 |                     |         |                          |         |
| Infection                               | 446 (17.8)   | 2061 (82.2)     | 1.51 (1.36 to 1.68) | < 0.001 | 1.57 (1.41 to 1.75)      | < 0.001 |
| No infection                            | 1512(12.1)   | 11023 (87.9)    | Ref.                |         | Ref.                     |         |
| <b>Week uncertain</b>                   |              |                 |                     |         |                          |         |
| Infection                               | 23 (21.5)    | 84 (78.5)       | 2.10 (1.29 to 3.42) | 0.003   | 2.21 (1.34 to 3.65)      | 0.002   |
| No infection                            | 56 (10.4)    | 482 (89.6)      | Ref.                |         | Ref.                     |         |

<sup>1</sup> Adjusted for child's sex, maternal asthma, maternal age at delivery, year of birth, birth weight, maternal smoking, infection during first year of life, parity, and chronic lung disease

**Table 5. Respiratory infection in the first year of life subsequent asthma risk after age 10 years and after age 16 years, stratified by gestational age**

|                         | Asthma<br>n (%) | No asthma<br>n (%) | HR (95% CI)         | P Value | HR <sup>1</sup> (95% CI) | P Value |
|-------------------------|-----------------|--------------------|---------------------|---------|--------------------------|---------|
| <b>≥ Age 10</b>         |                 |                    |                     |         |                          |         |
| Gestational age (weeks) |                 |                    |                     |         |                          |         |
| ≤27                     |                 |                    |                     |         |                          |         |
| Infection               | 45 (17.9)       | 207 (82.1)         | 1.83 (1.30 to 2.57) | 0.001   | 1.99 (1.40 to 2.82)      | < 0.001 |
| No infection            | 123 (10.1)      | 1098 (89.9)        | Ref.                |         | Ref.                     |         |
| 28-31                   |                 |                    |                     |         |                          |         |
| Infection               | 116 (16.0)      | 607 (84.0)         | 1.43 (1.17 to 1.76) | 0.001   | 1.52 (1.24 to 1.87)      | < 0.001 |
| No infection            | 411 (11.5)      | 3167 (88.5)        | Ref.                |         | Ref.                     |         |
| 32-36                   |                 |                    |                     |         |                          |         |
| Infection               | 635 (16.3)      | 3271 (83.7)        | 1.39 (1.27 to 1.52) | < 0.001 | 1.46 (1.33 to 1.59)      | < 0.001 |
| No infection            | 2328 (11.)      | 17200 (88.1)       | Ref.                |         | Ref.                     |         |
| 37- 41                  |                 |                    |                     |         |                          |         |
| Infection               | 5541 (15.9)     | 29298 (84.1)       | 1.44 (1.40 to 1.48) | < 0.001 | 1.49 (1.45 to 1.54)      | < 0.001 |
| No infection            | 19637 (11.3)    | 154557 (88.7)      | Ref.                |         | Ref.                     |         |
| > 41                    |                 |                    |                     |         |                          |         |
| Infection               | 397 (15.8)      | 2119 (84.2)        | 1.51 (1.35 to 1.69) | < 0.001 | 1.57 (1.41 to 1.76)      | < 0.001 |
| No infection            | 1340 (10.7)     | 11195 (89.3)       | Ref.                |         | Ref.                     |         |
| Uncertain               |                 |                    |                     |         |                          |         |
| Infection               | 19 (17.8)       | 88 (82.2)          | 1.93 (1.14 to 3.28) | 0.015   | 2.05 (1.19 to 3.55)      | 0.010   |
| No infection            | 50 (9.3)        | 488 (90.7)         | Ref.                |         | Ref.                     |         |
| <b>≥ Age 16</b>         |                 |                    |                     |         |                          |         |
| Gestational age (weeks) |                 |                    |                     |         |                          |         |
| ≤27                     |                 |                    |                     |         |                          |         |
| Infection               | 22 (8.8)        | 227 (91.2)         | 1.56 (0.96 to 2.52) | 0.071   | 1.65 (1.01 to 2.71)      | 0.047   |
| No infection            | 69 (5.7)        | 1132 (94.3)        | Ref.                |         | Ref.                     |         |
| 28-31                   |                 |                    |                     |         |                          |         |
| Infection               | 65 (9.2)        | 638 (90.8)         | 1.41 (1.07 to 1.86) | 0.014   | 1.45 (1.10 to 1.91)      | 0.009   |
| No infection            | 233 (6.7)       | 3249 (93.3)        | Ref.                |         | Ref.                     |         |
| 32-36                   |                 |                    |                     |         |                          |         |
| Infection               | 396 (10.5)      | 3362 (89.5)        | 1.43 (1.28 to 1.60) | < 0.001 | 1.49 (1.34 to 1.68)      | < 0.001 |
| No infection            | 1410 (7.5)      | 17379 (92.5)       | Ref.                |         | Ref.                     |         |
| 37- 41                  |                 |                    |                     |         |                          |         |
| Infection               | 3227 (9.7)      | 30040 (90.3)       | 1.37 (1.32 to 1.42) | < 0.001 | 1.42 (1.37 to 1.48)      | < 0.001 |
| No infection            | 11987 (7.2)     | 154347 (92.8)      | Ref.                |         | Ref.                     |         |
| > 41                    |                 |                    |                     |         |                          |         |
| Infection               | 248 (10.3)      | 2161 (89.7)        | 1.58 (1.37 to 1.82) | < 0.001 | 1.64 (1.42 to 1.90)      | < 0.001 |
| No infection            | 801 (6.7)       | 11244 (93.3)       | Ref.                |         | Ref.                     |         |
| Uncertain               |                 |                    |                     |         |                          |         |
| Infection               | 16 (15.2)       | 89 (84.8)          | 2.48 (1.37 to 4.51) | 0.003   | 2.72 (1.47 to 5.04)      | 0.002   |
| No infection            | 33 (6.2)        | 496 (93.8)         | Ref.                |         | Ref.                     |         |

<sup>1</sup> Adjusted for child's sex, maternal asthma, maternal age at delivery, year of birth, maternal smoking, birth weight, infection during first year of life, parity, and chronic lung disease.

## Respiratory infections in preterm infants and subsequent asthma

Scott Montgomery<sup>1 2 3</sup> (scott.montgomery@orebroll.se),  
Shahram Bahmanyar<sup>2 4</sup> (shahram.bahmanyar@ki.se),  
Ole Brus<sup>1</sup> (ole.brus@orebroll.se),  
Oula Hussein<sup>1</sup> (oula.hussein@orebroll.se),  
Paraskevi Kosma<sup>5 6</sup> (evaki782002@yahoo.com),  
Charlotte Palme-Kilander<sup>5</sup> (charlotte.palme-kilander@karolinska.se)

1. Clinical Epidemiology and Biostatistics, Örebro University Hospital & Örebro University, Örebro, Sweden.
2. The Clinical Epidemiology Unit, Karolinska Institutet, Stockholm, Sweden.
3. Department of Epidemiology and Public Health, University College London, UK.
4. The Centre for Pharmacoepidemiology, Karolinska Institutet, Stockholm, Sweden.
5. Department of Woman and Child health, Karolinska Institutet, Stockholm, Sweden
6. Division of Neonatology, Karolinska Hospital, Stockholm, Sweden

### Correspondence to:

Prof. Scott Montgomery  
Clinical Epidemiology and Biostatistics  
S-huset  
Örebro University Hospital  
701 85 Örebro  
Sweden

Scott.montgomery@orebroll.se  
Tel: +46 19 602 6210

**Word count** 2356 (main text); 238 (abstract)

**Keywords** gestational age; bronchiolitis; asthma; cohort study

**Funding** The study was supported by the Abbvie Research Fund and Örebro University strategic funding.

**Contributors** SM and CPK conceived the study and prepared the first draft of the manuscript; and with SB they developed the methods. SB and PK were responsible for obtaining and preparing the data. OB and OH conducted the statistical analysis and produced the tables. All authors were involved in critical editing of the manuscript.

**Competing interests** None.

**Ethics approval** Karolinska Regional Ethics Committee, Stockholm

**ABSTRACT**

**Objective** To investigate if gestational age modifies the association of airway infections, resulting in hospital admission during the first year after birth, with asthma risk after age 5 years.

**Patients** Swedish general population registers identified 42,334 children admitted to hospital for respiratory infection in their first year after birth during 1981-1995. They were individually matched with 211,594 children not admitted to hospital for infection.

**Methods** Cox regression analysis was used to estimate asthma risk after age 5 years (identified through diagnoses and prescribed treatments in registers), with adjustment for sex, gestational age, chronic lung disease, maternal asthma and smoking; and additionally for birth weight in models stratified for gestational age.

**Results** Hospital admission for airway infection in the first year is associated with an increased risk for subsequent asthma, producing an adjusted hazard ratio (and 95% confidence interval) of 1.51 (1.47 to 1.54). When stratified, the highest magnitude risk (statistically significant effect modification) was among those born with a gestational age of less than 28 weeks, producing an adjusted hazard ratio of 2.22 (1.59 to 3.09). This higher magnitude risk asthma persisted until after age 10 years. Early infection was statistically significantly associated with asthma after age 16 years for all gestational age groups, but the difference in risk magnitude between the extremely prematurely born and other children was reduced.

**Conclusions** Extremely preterm infants are most likely to have chronic respiratory sequelae following respiratory infections in early life.



## STRENGTHS AND LIMITATIONS OF THIS STUDY

### Strengths

- The vast majority of infants admitted to hospital with airway infections in their first year after birth in Sweden during the study period will have been identified.
- The use of prospectively recorded national register data allow for longitudinal analysis of asthma risk, with follow-up into early adulthood.

### Limitations

- The infections are incompletely characterised, particularly during earlier years.
- Asthma was identified based on inpatient diagnoses and prescribed medication, but it was not possible to confirm the accuracy of diagnoses.

## INTRODUCTION

Respiratory infection in the first year after birth<sup>[1-3]</sup>, and preterm birth<sup>[4-7]</sup> are both markers of subsequent asthma risk. How the interrelationship of these factors relates to persistent respiratory disease is incompletely understood.

The lungs of preterm infants are underdeveloped with immature airways and the association of prematurity with later respiratory disease indicates asthma's developmental origin<sup>[8-10]</sup>. Respiratory infections requiring hospital admission during the first year after birth may signal susceptibility to asthma or may be causally implicated in asthma aetiology; and these explanations are not necessarily mutually exclusive. Respiratory infection *epidemics* that produce infections among infants are associated with a raised risk of persistent respiratory disease<sup>[11]</sup>, consistent with a causal explanation for at least a proportion of the association.

Earlier research has demonstrated that degree of prematurity is relevant to risk of persistent asthma and bronchiolitis in the first year<sup>[6]</sup>. This paper investigates whether the *combination* (interaction) of early respiratory infection with prematurity, when the immature lungs may

1  
2  
3 be particularly susceptible to long-term damage, represents a disproportionately raised risk  
4  
5 for persistent respiratory disease. Swedish general population registers were used to identify  
6  
7 a cohort of children who were admitted to hospital due to respiratory infection in their first  
8  
9 year after birth and they were matched with a cohort of children not admitted to hospital  
10  
11 for infection in their first year.  
12  
13

## 14 15 16 17 18 19 20 21 22 **METHODS**

23  
24 All children in Sweden admitted to hospital for severe infections that affect the airways in  
25  
26 the 12 months following birth between 1981 and 1995 were identified (N=4233). They were  
27  
28 individually matched with children who were not admitted to hospital for these infections in  
29  
30 their first year (N=211594), with matching for gestational age, region of birth, and the month  
31  
32 and year of their birth. Each exposed child was matched with five unexposed children,  
33  
34 selected at random from among those with relevant characteristics. If fewer than five  
35  
36 unexposed infants were available for matching with an exposed subject, all suitable children  
37  
38 were selected. Follow-up to identify chronic airway disease (asthma) was up to 2010.  
39  
40  
41  
42  
43  
44

### 45 **Registers**

46  
47 This study utilised national Swedish register data that can be linked at the individual level  
48  
49 using the unique personal identity number issued to all residents. Information on pregnancy  
50  
51 and delivery, and other characteristics of mother and baby were obtained through the  
52  
53 Medical Birth Register, which has recorded almost every delivery in Sweden since 1973. The  
54  
55 Patient Register has had complete national coverage of inpatient diagnoses since 1987 and  
56  
57  
58  
59  
60

1  
2  
3 included outpatient diagnoses since 2000. The Prescription Register has provided  
4  
5 information on all prescribed medication since 2005.  
6  
7  
8  
9

## 10 **Measures**

11  
12 The Patient Register was used to identify respiratory infections in the first year after birth  
13  
14 that resulted in hospital admission; and these diagnoses are listed in Table 1. This register  
15  
16 also identified diagnoses of lung disease through ICD codes consistent with asthma in  
17  
18 children and young adults. To avoid surveillance bias (incidental reporting of asthma in  
19  
20 children admitted or investigated for other diseases) asthma was only defined as the  
21  
22 outcome here when it was the sole diagnosis made at the hospital visit. **The Prescription**  
23  
24 **Register – which records all treatments dispensed through pharmacies (including all**  
25  
26 **prescriptions from primary care)** was used to identify pharmaceutical treatments for asthma  
27  
28 in children and young adults and the selected treatments are presented in table 1. The  
29  
30 Medical Birth Register provided information on gestational age, birth weight, maternal age  
31  
32 at delivery, maternal smoking during pregnancy, maternal asthma, sex of the child, parity  
33  
34 and a diagnosis of neonatal chronic lung disease (CLD: ICD-8 776.6 and ICD-9 770H): these  
35  
36 measures were categorised as presented in table 2.  
37  
38  
39  
40  
41  
42  
43  
44  
45  
46  
47  
48  
49  
50  
51  
52  
53  
54  
55  
56  
57  
58  
59  
60

## 45 **Statistical analysis**

46  
47 Cox regression was used to estimate hazard ratios associated with asthma after 5 years of  
48  
49 age (hospital diagnosis or treatment), with follow-up to first asthma event, exit from the  
50  
51 study population or end of the study period, whichever came first. The following  
52  
53 independent measures were also included in models individually, then mutually adjusted for  
54  
55 each other: respiratory infection in the first year after birth, gestational age, sex, maternal  
56  
57  
58  
59  
60

1  
2  
3 age at delivery, parity, maternal smoking, a maternal diagnosis of asthma, CLD and year of  
4  
5 delivery (all modelled as series of binary dummy variables in the categories shown in tables 2  
6  
7 and 3). The non-stratified models (table 3) were not adjusted for birth weight, as it was  
8  
9 collinear with gestational age while the stratified models (tables 4 and 5) and interaction  
10  
11 tests were adjusted for a continuous measure of birth weight. Log-minus-log plots were  
12  
13 used to assess whether the proportional hazards assumption was violated: the curves  
14  
15 comparing the exposed and unexposed cohorts did not converge and proportionality was  
16  
17 maintained.  
18  
19  
20  
21  
22  
23

24 The main analysis concerns the *combination* of early infection with gestational age and this  
25  
26 was investigated in models for the association of first-year infection with asthma after age 5  
27  
28 years, stratified by gestational age, with adjustment for all of the potential confounding  
29  
30 factors described above, with the addition of birth weight modelled as a continuous  
31  
32 measure. To assess effect modification by gestational age for the association of early  
33  
34 infection with asthma, interaction testing using the entire (non-stratified) study population  
35  
36 was undertaken. The interaction terms for gestational age (categorical) by infection were  
37  
38 adjusted for the main effect (gestational age and infection), as well as for all of the  
39  
40 previously described potential confounding factors.  
41  
42  
43  
44  
45  
46  
47

48 To assess whether the combination of prematurity with first year infection is a risk for  
49  
50 asthma that persists beyond early childhood, the above analysis stratified for gestational age  
51  
52 was repeated, but with truncated follow-up to identify asthma after age 10 years and after  
53  
54 age 16 years.  
55  
56  
57  
58  
59  
60

1  
2  
3 SPSS software was used and statistical significance was defined as confidence intervals that  
4  
5 do not include 1.00 and p values below 0.05.  
6  
7

## 9 10 **RESULTS**

11  
12 As the two cohorts were matched, the distributions for gestational age and year of birth are  
13  
14 almost identical (table 2). This matching is also reflected in the very similar distributions for  
15  
16 birth weight. Children admitted to hospital with infections were more often male and their  
17  
18 mothers were more likely to be younger, smokers, with a diagnosis of asthma and to have  
19  
20 had a greater number of previous pregnancies. CLD was also more common in the infection  
21  
22 cohort, particularly among the extremely preterm infants (12.3% compared with 7.9%  
23  
24 among the extremely preterm).  
25  
26  
27

28  
29  
30  
31 Respiratory infection during the first year is statistically significantly associated with a raised  
32  
33 risk of asthma after age 5 years, both before and after adjustment for potential confounding  
34  
35 factors (table 3). Female sex, neonatal lung disease, maternal asthma, fewer previous  
36  
37 pregnancies are associated with a statistically significant raised asthma risk in the adjusted  
38  
39 model. Gestational age was a matching characteristic, so associations with this measure are  
40  
41 not presented.  
42  
43  
44

45  
46  
47 Table 4 shows the association of hospital admission for infection in the first year with  
48  
49 asthma after age 5 years, *stratified by gestational age*. Infection is associated with asthma  
50  
51 across all of the gestational age groups after adjustment for potential confounding factors.  
52  
53  
54 The highest magnitude association is among the most preterm infants. A notably raised risk  
55  
56 was also observed among those with uncertain gestational age. **Interaction testing among**  
57  
58  
59  
60

1  
2  
3 the entire study population confirms statistically significant effect modification by the most  
4  
5 premature gestational age group, at less than 28 weeks compared with the infants who were  
6  
7 born at term. The interaction results were not statistically significant for the other  
8  
9 gestational age groups, including where it was unspecified. After adjustment for the main  
10  
11 effects the hazard ratio (and 95% confidence interval) is 1.41 (1.02 to 1.95; p for  
12  
13 interaction=0.034) and with additional adjustment for the potential confounding factors it is  
14  
15 1.40 (1.01 to 1.93; p for interaction=0.042).  
16  
17  
18  
19  
20

21  
22 Early Infection is associated with asthma after age 10 and after age 16 years for all  
23  
24 gestational age groups, but although still statistically significant, the notably increased  
25  
26 magnitude for the most premature is somewhat reduced after age 16 years (table 5).  
27  
28  
29

30  
31 The analysis was repeated excluding those with missing maternal smoking information and  
32  
33 the results were not notably altered (data not shown).  
34  
35  
36  
37

## 38 DISCUSSION

39  
40 In this register-based cohort study, hospital admission for respiratory infection in the 12  
41  
42 months following birth was associated with an increased risk of asthma after age 5 years,  
43  
44 particularly among those born extremely prematurely.  
45  
46  
47  
48

49  
50 Another study using Swedish register data found that early infection and prematurity were  
51  
52 independently associated with later increased corticosteroid use<sup>[6]</sup>. While the results  
53  
54 between the earlier study and ours are similar for associations with infection, the cohorts in  
55  
56 our study were matched for gestational age, which was considered as a potential modifying  
57  
58  
59  
60

1  
2  
3 factor for the effect of early infections. Here, asthma after age 5 years was identified  
4  
5 through prescribed corticosteroids and other asthma medication, as well as inpatient or  
6  
7 outpatient hospital diagnoses. We used several strategies to ensure that the associations  
8  
9 are with asthma rather than other comorbidity associated with prematurity and early  
10  
11 infection. Only diagnoses of asthma made after age 5 years were included, as these are more  
12  
13 likely to represent persistent asthma. We limited diagnoses to instances where asthma was  
14  
15 the sole diagnosis recorded by the outpatient or inpatient discharge summary to minimise  
16  
17 surveillance bias, where admission for another condition results in an incidental diagnosis of  
18  
19 asthma: this can produce a conservative estimate of association. While it can be difficult to  
20  
21 differentiate between the effects of infection and susceptibility to infection, we attempted  
22  
23 to tackle this through adjustment for a variety of potential confounding factors, including  
24  
25 birth weight within gestational age categories to provide fine-grain control for foetal  
26  
27 development. The extremely preterm infants more often had CLD, possibly signalling to both  
28  
29 susceptibility to early infection and also asthma: we therefore adjusted for neonatal CLD.  
30  
31  
32  
33  
34  
35  
36  
37

38 This study has some potential limitations. Identification of asthma through registers does not  
39  
40 provide information about disease phenotype, including whether allergic sensitisation is  
41  
42 implicated and confirmation of individual diagnoses is not possible. The infections defining  
43  
44 the exposed cohort are not always well characterised (particularly from the earlier periods),  
45  
46 but all will affect the lungs and were sufficiently serious to result in hospital admission. Prior  
47  
48 to 1990, respiratory syncytial virus (RSV) was often diagnosed as an unspecified viral  
49  
50 infection, so we included some non-specific infections. Earlier studies found that RSV was  
51  
52 responsible for the majority of bronchiolitis diagnoses during the first year after birth<sup>[12 13]</sup>,  
53  
54 while rhinovirus was associated with 18% of bronchiolitis diagnoses, although hospital  
55  
56  
57  
58  
59  
60

1  
2  
3 admission was less common<sup>[14]</sup>. It is possible that use of more specific diagnoses, not  
4  
5 available through the Patient Register, would result in higher magnitude associations. We  
6  
7 were unable to examine delivery mode as a potential confounding factor as this was not  
8  
9 available in our data set: caesarean section has been linked with an increased asthma risk in  
10  
11 term infants<sup>[15]</sup>. Number of older siblings is an important indicator of asthma risk. While this  
12  
13 was not measured directly, we adjusted for parity as a reliable indicator of number of older  
14  
15 siblings. Also, it has been hypothesised that previous pregnancies – directly measured by  
16  
17 parity - may influence immune-mediated disease risk through changes in the mother's  
18  
19 immune profile<sup>[16]</sup>. The measure of maternal smoking was incomplete as it was not always  
20  
21 included in the Medical Birth Register. The proportions without smoking data were almost  
22  
23 identical in both the exposed and unexposed cohorts. When the analysis was restricted to  
24  
25 mothers with complete smoking data, the results were not materially altered. Our study will  
26  
27 have underestimated the total number of asthma diagnoses, as we did not have data from  
28  
29 primary care, and because we excluded asthma with comorbid diagnoses to avoid  
30  
31 confounding by comorbidity. The use of prescribed medication will have improved our ability  
32  
33 to identify chronic asthma as this will identify those diagnosed and treated in primary care.  
34  
35 The two strategies to identify asthma were combined to maximise reliable asthma  
36  
37 identification and statistical power. Unavoidably, gestational age was unavailable for some  
38  
39 infants: the higher magnitude asthma risk associated with infections in this group may be  
40  
41 due to a proportion who were also very premature, and possibly other risks. As interaction  
42  
43 testing by gestational age was undertaken, adjustment rather than internal stratification for  
44  
45 this factor was performed. Despite this, use of a matching characteristic may still have  
46  
47 resulted in underestimation of interaction effects between infection and gestational age.  
48  
49  
50  
51  
52  
53  
54  
55  
56  
57  
58  
59  
60



1  
2  
3 Both RSV and rhinovirus infections in infancy have been linked with subsequent childhood  
4  
5 wheezing<sup>[1 3]</sup>, but the association of early life infections with allergy and possible asthma risk  
6  
7 has a complicated pattern. While some markers of infection, such as positive serology for  
8  
9 Epstein-Barr virus (EBV) and cytomegalovirus (CMV) are associated with a reduced risk of  
10  
11 allergic sensitisation<sup>[17]</sup>, there is evidence that early infection with RSV may increase the risk  
12  
13 of allergic asthma through its influence on regulatory T-cell function<sup>[18]</sup>. However, pre-  
14  
15 existing atopy – or associated characteristics - may also influence subsequent infection risk,  
16  
17 as rhinovirus bronchiolitis has been found to occur more frequently in infants who had prior  
18  
19 allergic sensitization<sup>[19]</sup>. Whether or not allergy is implicated, respiratory infections in  
20  
21 infancy, both RSV and non-RSV infections, are thought to contribute to airway impairment<sup>[3</sup>  
22  
23 <sup>20-23]</sup>. The possible non-mutually exclusive mechanisms include through structural  
24  
25 damage<sup>[24]</sup>, modification of the mucosal immunology of the lungs<sup>[25]</sup> or through epigenetic  
26  
27 changes<sup>[26]</sup>. Treatment of infections by antibiotics has been suggested as a risk for asthma,  
28  
29 but the evidence is weak; and reviews suggest that the association is due to confounding by  
30  
31 indication.  
32  
33  
34  
35  
36  
37  
38  
39  
40

41 Lung development continues throughout foetal life and babies who are born prematurely  
42  
43 have developmental deficits of airway<sup>[27-30]</sup> and may result in chronic asthma<sup>[8]</sup>, which can  
44  
45 diminish with increasing age as lung function improves<sup>[31 32]</sup>. Atopic sensitization – and thus  
46  
47 allergic asthma that may be more persistent in adulthood - is less common in those born  
48  
49 preterm compared with term deliveries<sup>[33]</sup>. Thus, the combination of early infection and  
50  
51 prematurity may conspire to increase both allergic and non-allergic risks for asthma, helping  
52  
53 to explain the multiplicative effect of this combination of exposures for the risk of  
54  
55 subsequent asthma. The notably higher risk of asthma associated with this exposure  
56  
57  
58  
59  
60

1  
2  
3 combination continues throughout childhood, but appears to be less profound after age 16  
4  
5 years, possibly reflecting age-associated changes.  
6  
7

8  
9  
10 This study provides evidence that respiratory infections resulting in hospital admission  
11  
12 during the first year after birth are a risk for subsequent asthma after age 5 years. The  
13  
14 increase in childhood asthma risk is particularly high among extremely preterm infants.  
15  
16  
17  
18  
19  
20  
21  
22  
23  
24  
25  
26  
27  
28  
29  
30  
31  
32  
33  
34  
35  
36  
37  
38  
39  
40  
41  
42  
43  
44  
45  
46  
47  
48  
49  
50  
51  
52  
53  
54  
55  
56  
57  
58  
59  
60

**What is already known on this subject**

- Infants born preterm have an increased risk of airway disease and subsequent childhood asthma.
- Respiratory infection in infancy is also associated with an increased risk of childhood asthma, independent of gestational age.

**What this study adds**

- Extremely premature infants who experience respiratory infections before one year of age have an even higher increase in risk of subsequent asthma than term infants.

## REFERENCES

1. Sigurs N, Aljassim F, Kjellman B, et al. Asthma and allergy patterns over 18 years after severe RSV bronchiolitis in the first year of life. *Thorax* 2010;**65**(12):1045-52.
2. Hyvarinen MK, Kotaniemi-Syrjanen A, Reijonen TM, Korhonen K, Korppi MO. Lung function and bronchial hyper-responsiveness 11 years after hospitalization for bronchiolitis. *Acta Paediatr* 2007;**96**(10):1464-9.
3. Jackson DJ, Gangnon RE, Evans MD, et al. Wheezing rhinovirus illnesses in early life predict asthma development in high-risk children. *Am J Respir Crit Care Med*. 2008;**178**(7):667-72.
4. Kallen B, Finnstrom O, Nygren KG, Otterblad Olausson P. Association between preterm birth and intrauterine growth retardation and child asthma. *Eur Respir J* 2013;**41**(3):671-6.
5. Vrijlandt EJ, Kerstjens JM, Duiverman EJ, Bos AF, Reijneveld SA. Moderately Preterm Children Have More Respiratory Problems during Their First 5 Years of Life Than Children Born Full Term. *Am J Respir Crit Care Med* 2013;**187**(11):1234-40.
6. Vogt H, Lindstrom K, Braback L, Hjern A. Preterm birth and inhaled corticosteroid use in 6- to 19-year-olds: a Swedish national cohort study. *Pediatrics* 2011;**127**(6):1052-9.
7. Doyle LW. Respiratory function at age 8-9 years in extremely low birthweight/very preterm children born in Victoria in 1991-1992. *Pediatr Pulmonol* 2006;**41**(6):570-6.
8. Fawke J, Lum S, Kirkby J, et al. Lung function and respiratory symptoms at 11 years in children born extremely preterm: the EPICure study. *Am J Respir Crit Care Med* 2010;**182**(2):237-45.
9. Jaakkola JJ, Ahmed P, Ieromnimon A, et al. Preterm delivery and asthma: a systematic review and meta-analysis. *J Allergy Clin Immunol* 2006;**118**(4):823-30.
10. Greenough A. Long-term pulmonary outcome in the preterm infant. *Neonatology* 2008;**93**(4):324-7.
11. Wu P, Hartert TV. Evidence for a causal relationship between respiratory syncytial virus infection and asthma. *Expert Rev Anti Infect Ther* 2011;**9**(9):731-45.
12. Broughton S, Roberts A, Fox G, et al. Prospective study of healthcare utilisation and respiratory morbidity due to RSV infection in prematurely born infants. *Thorax* 2005;**60**(12):1039-44.
13. Wickman M, Farahmand BY, Persson PG, Pershagen G. Hospitalization for lower respiratory disease during 20 yrs among under 5 yr old children in Stockholm County: a population based survey. *Eur Respir J* 1998;**11**(2):366-70.
14. Miller EK, Williams JV, Gebretsadik T, et al. Host and viral factors associated with severity of human rhinovirus-associated infant respiratory tract illness. *J Allergy Clin Immunol* 2011;**127**(4):883-91.
15. Almqvist C, Cnattingius S, Lichtenstein P, Lundholm C. The impact of birth mode of delivery on childhood asthma and allergic diseases--a sibling study. *Clin Exp Allergy* 2012;**42**(9):1369-76.
16. Amoudruz P, Holmlund U, Schollin J, Sverremark-Ekstrom E, Montgomery SM. Maternal country of birth and previous pregnancies are associated with breast milk characteristics. *Pediatr Allergy Immunol* 2009;**20**(1):19-29.
17. Nilsson C, Linde A, Montgomery SM, et al. Does early EBV infection protect against IgE sensitization? *J Allergy Clin Immunol* 2005;**116**(2):438-44.

18. Krishnamoorthy N, Khare A, Oriss TB, et al. Early infection with respiratory syncytial virus impairs regulatory T cell function and increases susceptibility to allergic asthma. *Nat Med* 2012;**18**(10):1525-30.
19. Jackson DJ, Evans MD, Gangnon RE, et al. Evidence for a causal relationship between allergic sensitization and rhinovirus wheezing in early life. *Am J Respir Crit Care Med* 2012;**185**(3):281-5.
20. Fjaerli HO, Farstad T, Rod G, Ufert GK, Gulbrandsen P, Nakstad B. Acute bronchiolitis in infancy as risk factor for wheezing and reduced pulmonary function by seven years in Akershus County, Norway. *BMC Pediatr* 2005;**5**:31.
21. Romero JR, Stewart DL, Buysman EK, Fernandes AW, Jafri HS, Mahadevia PJ. Serious early childhood wheezing after respiratory syncytial virus lower respiratory tract illness in preterm infants. *Clin Ther* 2010;**32**(14):2422-32.
22. Kopenon P, Helminen M, Paassilta M, Luukkaala T, Korppi M. Preschool asthma after bronchiolitis in infancy. *Eur Respir J* 2012;**39**(1):76-80.
23. Mikalsen IB, Halvorsen T, Oymar K. The outcome after severe bronchiolitis is related to gender and virus. *Pediatr Allergy Immunol* 2012;**23**(4):391-8.
24. Benjamin JT, Carver BJ, Plosa EJ, et al. NF-kappaB activation limits airway branching through inhibition of Sp1-mediated fibroblast growth factor-10 expression. *J Immunol* 2010;**185**(8):4896-903.
25. Han J, Takeda K, Gelfand EW. The Role of RSV Infection in Asthma Initiation and Progression: Findings in a Mouse Model. *Pulm Med* 2011;**2011**:748038.
26. Joss-Moore LA, Lane RH. Epigenetics and the developmental origins of disease: the key to unlocking the door of personalized medicine. *Epigenomics* 2012;**4**(5):471-3.
27. Hjalmarson O, Sandberg K. Abnormal lung function in healthy preterm infants. *Am J Respir Crit Care Med* 2002;**165**(1):83-7.
28. Friedrich L, Pitrez PM, Stein RT, Goldani M, Tepper R, Jones MH. Growth rate of lung function in healthy preterm infants. *Am J Respir Crit Care Med* 2007;**176**(12):1269-73.
29. Boyle EM, Poulsen G, Field DJ, et al. Effects of gestational age at birth on health outcomes at 3 and 5 years of age: population based cohort study. *BMJ* 2012;**344**:e896.
30. Kotecha SJ, Watkins WJ, Paranjothy S, Dunstan FD, Henderson AJ, Kotecha S. Effect of late preterm birth on longitudinal lung spirometry in school age children and adolescents. *Thorax* 2012;**67**(1):54-61.
31. Narang I, Rosenthal M, Cremonesini D, Silverman M, Bush A. Longitudinal evaluation of airway function 21 years after preterm birth. *Am J Respir Crit Care Med* 2008;**178**(1):74-80.
32. Crump C, Winkleby MA, Sundquist J, Sundquist K. Risk of asthma in young adults who were born preterm: a Swedish national cohort study. *Pediatrics* 2011;**127**(4):e913-20.
33. Siltanen M, Wehkalmppi K, Hovi P, et al. Preterm birth reduces the incidence of atopy in adulthood. *J Allergy Clin Immunol* 2011;**127**(4):935-42.

**Table 1. Respiratory infections and prescribed asthma treatments**

| <b>Respiratory infections during the first year of life</b> |                                                             |
|-------------------------------------------------------------|-------------------------------------------------------------|
| Adenovirus infection                                        | Pneumococcal pneumonia                                      |
| Other specified Adenovirus infection                        | Pneumonia                                                   |
| Bordetella Pertussis                                        | Pneumonia due to streptococcus                              |
| Bronchitis                                                  | Pneumonia due to Haemophilus influenzae                     |
| Bronchiolitis                                               | Pneumonia due to respiratory syncytial virus                |
| Bronchopneumonia organism unspecified                       | Other unspecified pneumonia                                 |
| Coxsackie virus infection                                   | Bacterial pneumonia unspecified                             |
| Cytomegalovirus                                             | Other specified viral pneumonia                             |
| Echo virus infection                                        | Pneumonia in other infectious diseases classified elsewhere |
| Influenza                                                   | Rhinovirus infection                                        |
| Influenza with other respiratory manifestations             | Other specified viral infections                            |
| Influenza unspecified                                       | Suspected viral infections                                  |
| Influenza with pleuropneumonia                              | Unspecified viral infections                                |
| <b>Prescribed treatments</b>                                |                                                             |
| Beclomethasone                                              | Omalizumab                                                  |
| Budesonide                                                  | Salbutamol                                                  |
| Flutikasone                                                 | Salmeterol                                                  |
| Formoterol                                                  | Sodiumchromoglicate                                         |
| Indakaterol                                                 | Terbutaline                                                 |
| Ipratropium                                                 | Theophylline                                                |
| Mometasone                                                  | Tiotropium bromide                                          |
| Montelukast                                                 |                                                             |

**Table 2. Characteristics of the cohorts defined by respiratory infection during the first year of life**

|                               | Respiratory infection in first year | No respiratory infection in first year | Total            |
|-------------------------------|-------------------------------------|----------------------------------------|------------------|
|                               | n= 42334 (16.7%)                    | n= 211594 (83.3%)                      | n= 253928 (100%) |
| Prescribed asthma medication* | 7485 (17.7)                         | 26591 (12.6)                           | 34076 (13.4)     |
| Hospital asthma diagnosis*    | 420 (1.0)                           | 761 (0.4)                              | 1181 (0.5)       |
| No asthma*                    | 34749 (82.1)                        | 184775 (87.3)                          | 219524 (86.5)    |
| Gestational age (weeks)       |                                     |                                        |                  |
| ≤27                           | 252 (0.6)                           | 1221 (0.6)                             | 1473 (0.6)       |
| 28-31                         | 723 (1.7)                           | 3578 (1.7)                             | 4301 (1.7)       |
| 32-36                         | 3906 (9.2)                          | 19528 (9.2)                            | 23434 (9.2)      |
| 37- 41                        | 34839 (82.3)                        | 174194 (82.3)                          | 209033 (82.3)    |
| > 41                          | 2507 (5.9)                          | 12535 (5.9)                            | 15042 (5.9)      |
| Uncertain                     | 107 (0.3)                           | 538 (0.3)                              | 645 (0.3)        |
| Birth weight                  |                                     |                                        |                  |
| <1000g                        | 241(0.6)                            | 1292 (0.6)                             | 1533 (0.6)       |
| > 1000-1500g                  | 580 (1.4)                           | 2714 (1.3)                             | 3294 (1.3)       |
| >1500-2000g                   | 953 (2.3)                           | 4300 (2.0)                             | 5253 (2.1)       |
| >2000-2750g                   | 4099 (9.7)                          | 18815 (8.9)                            | 22914 (9.0)      |
| >2750-3250g                   | 9727 (23.0)                         | 47617 (22.5)                           | 57344 (22.6)     |
| >3250-4000g                   | 20178 (47.7)                        | 104693 (49.5)                          | 124871 (49.2)    |
| > 4000g                       | 6426 (15.2)                         | 31524 (14.9)                           | 37950 (14.9)     |
| Not recorded                  | 130 (0.3)                           | 639 (0.3)                              | 769 (0.3)        |
| Maternal asthma               |                                     |                                        |                  |
| Current                       | 721 (1.7)                           | 2754 (1.3)                             | 3475 (1.4)       |
| Previous                      | 210 (0.5)                           | 749 (0.4)                              | 959 (0.4)        |
| None                          | 41403 (97.8)                        | 208091 (98.3)                          | 249494 (98.3)    |
| Maternal age at delivery      |                                     |                                        |                  |
| 13-18                         | 755 (1.8)                           | 2917 (1.4)                             | 3672 (1.5)       |
| 19-25                         | 14230 (33.6)                        | 66604 (31.5)                           | 80834 (31.8)     |
| 26-30                         | 15312 (36.2)                        | 76752 (36.3)                           | 92064 (36.3)     |
| 31-35                         | 8911 (21.0)                         | 46336 (21.9)                           | 55247 (21.8)     |
| 36-40                         | 2757 (6.5)                          | 16673 (7.9)                            | 19430 (7.7)      |
| 41-54                         | 369 (0.9)                           | 2312 (1.1)                             | 2681 (1.1)       |
| Maternal smoking              |                                     |                                        |                  |
| Non-smoker                    | 23871 (56.4)                        | 134802 (63.7)                          | 158673 (62.5)    |
| Smoker                        | 12429 (29.4)                        | 46817 (22.1)                           | 59246 (23.3)     |
| Not recorded                  | 6034 (14.3)                         | 29975 (14.2)                           | 36009 (14.2)     |
| Child's sex                   |                                     |                                        |                  |
| Female                        | 17619 (41.6)                        | 103007 (48.7)                          | 120626 (47.5)    |
| Male                          | 24715 (58.4)                        | 108587 (51.3)                          | 133302 (52.5)    |
| Parity                        |                                     |                                        |                  |
| 1                             | 12714 (30.0)                        | 87275 (41.2)                           | 99989 (39.4)     |
| 2                             | 17247 (40.7)                        | 74534 (35.2)                           | 91781 (36.1)     |
| 3                             | 8270 (19.5)                         | 34880 (16.5)                           | 43150 (17.0)     |
| 4 or more                     | 4103 (9.7)                          | 14905 (7.0)                            | 19008 (7.5)      |
| Chronic lung disease          |                                     |                                        |                  |
| No                            | 42272 (99.9)                        | 211416 (99.9)                          | 253688 (99.9)    |
| Yes                           | 62 (0.1)                            | 178 (0.1)                              | 240 (0.1)        |

\* These categories are not mutually exclusive.

**Table 3. Early life characteristics and subsequent asthma risk after age 5 years**

| Characteristic                      | Asthma<br>n (%) | No asthma<br>n (%) | Unadjusted HR<br>(95% CI) | P value | Adjusted <sup>1</sup> HR<br>(95% CI) | P value |
|-------------------------------------|-----------------|--------------------|---------------------------|---------|--------------------------------------|---------|
| Respiratory infection in first year |                 |                    |                           |         |                                      |         |
| Yes                                 | 7585 (17.9)     | 34749 (82.1)       | 1.45 (1.41 to 1.49)       | <0.001  | 1.51 (1.47 to 1.54)                  | <0.001  |
| No                                  | 26819 (12.7)    | 184775 (87.3)      | Ref.                      |         | Reference                            |         |
| Maternal asthma                     |                 |                    |                           |         |                                      |         |
| Current                             | 921 (26.5)      | 2554 (73.5)        | 3.86 (3.61 to 4.12)       | <0.001  | 1.94 (1.82 to 2.08)                  | <0.001  |
| Previous                            | 222 (23.1)      | 737 (76.9)         | 3.05 (2.67 to 3.48)       | <0.001  | 1.38 (1.21 to 1.58)                  | <0.001  |
| None                                | 33261 (13.3)    | 216233 (86.7)      | Ref.                      |         | Ref.                                 |         |
| Maternal age at delivery (years)    |                 |                    |                           |         |                                      |         |
| 13-18                               | 517 (14.1)      | 3155 (85.9)        | 0.96 (0.88 to 1.05)       | 0.372   | 0.98 (0.90 to 1.07)                  | 0.625   |
| 19-25                               | 11451 (14.2)    | 69383 (85.8)       | 1.02 (1.00 to 1.05)       | 0.069   | 1.03 (1.00 to 1.06)                  | 0.026   |
| 26-30                               | 12249 (13.3)    | 79815 (86.7)       | Ref.                      |         | Ref.                                 |         |
| 31-35                               | 7276 (13.2)     | 47971 (86.8)       | 0.99 (0.96 to 1.02)       | 0.490   | 1.02 (0.99 to 1.05)                  | 0.140   |
| 36-40                               | 2562 (13.2)     | 16868 (86.8)       | 1.00 (0.96 to 1.05)       | 0.830   | 1.05 (1.01 to 1.10)                  | 0.029   |
| 41-54                               | 349 (13.0)      | 2332 (87.0)        | 1.00 (0.90 to 1.12)       | 0.934   | 1.05 (0.94 to 1.17)                  | 0.391   |
| Maternal smoking                    |                 |                    |                           |         |                                      |         |
| Non-smoker                          | 21701 (13.7)    | 136972 (86.3)      | Ref.                      |         | Ref.                                 |         |
| Smoker                              | 8278 (14.0)     | 50968 (86.0)       | 0.93 (0.91 to 0.96)       | <0.001  | 1.01 (0.99 to 1.04)                  | 0.380   |
| Not recorded                        | 4425 (12.3)     | 31584 (87.7)       | 0.59 (0.57 to 0.61)       | <0.001  | 0.90 (0.87 to 0.93)                  | <0.001  |
| Child's sex                         |                 |                    |                           |         |                                      |         |
| Female                              | 18150 (15.0)    | 102476 (85.0)      | 1.25 (1.22 to 1.27)       | <0.001  | 1.27 (1.24 to 1.29)                  | <0.001  |
| Male                                | 16254 (12.2)    | 117048 (87.8)      | Ref.                      |         | Ref.                                 |         |
| Parity                              |                 |                    |                           |         |                                      |         |
| 1                                   | 14371 (14.4)    | 85618 (85.6)       | Ref.                      |         | Ref.                                 |         |
| 2                                   | 12230 (13.3)    | 79551 (86.7)       | 0.93 (0.90 to 0.95)       | <0.001  | 0.90 (0.88 to 0.93)                  | <0.001  |
| 3                                   | 5437 (12.6)     | 37713 (87.4)       | 0.87 (0.84 to 0.89)       | <0.001  | 0.84 (0.82 to 0.87)                  | <0.001  |
| 4 or more                           | 2366 (12.4)     | 16642 (87.6)       | 0.88 (0.84 to 0.92)       | <0.001  | 0.81 (0.78 to 0.85)                  | <0.001  |
| Chronic lung disease                |                 |                    |                           |         |                                      |         |
| No                                  | 34360           | 219328             | Ref.                      |         | Ref.                                 |         |
| Yes                                 | 44              | 196                | 1.59 (1.18 to 2.14)       | 0.002   | 1.44 (1.06 to 1.96)                  | 0.019   |

<sup>1</sup> Adjusted for child's sex, maternal asthma, maternal age at delivery, year of birth, maternal smoking, gestational age, infection during first year of life, parity, and chronic lung disease



**Table 4. Respiratory infection in the first year of life subsequent asthma risk after age 5 years, stratified by gestational age**

| Infection stratified by gestational age | Asthma n (%) | No asthma n (%) | HR (95% CI)         | P Value | HR <sup>1</sup> (95% CI) | P Value |
|-----------------------------------------|--------------|-----------------|---------------------|---------|--------------------------|---------|
| <b>Week 0-27</b>                        |              |                 |                     |         |                          |         |
| Infection                               | 52 (20.6)    | 200 (79.4)      | 2.03 (1.47 to 2.80) | < 0.001 | 2.22 (1.59 to 3.09)      | < 0.001 |
| No infection                            | 130 (10.6)   | 1091 (89.4)     | Ref.                |         | Ref.                     |         |
| <b>Week 28-31</b>                       |              |                 |                     |         |                          |         |
| Infection                               | 132 (18.3)   | 591 (81.7)      | 1.47 (1.21 to 1.78) | < 0.001 | 1.57 (1.29 to 1.92)      | < 0.001 |
| No infection                            | 458 (12.8)   | 3130 (87.2)     | Ref.                |         | Ref.                     |         |
| <b>Week 32-36</b>                       |              |                 |                     |         |                          |         |
| Infection                               | 738 (18.9)   | 3168 (81.1)     | 1.47 (1.35 to 1.59) | < 0.001 | 1.54 (1.42 to 1.68)      | < 0.001 |
| No infection                            | 2588 (13.3)  | 16940 (86.7)    | Ref.                |         | Ref.                     |         |
| <b>Week 37-41</b>                       |              |                 |                     |         |                          |         |
| Infection                               | 6194 (17.8)  | 28645 (82.2)    | 1.44 (1.40 to 1.48) | < 0.001 | 1.49 (1.45 to 1.53)      | < 0.001 |
| No infection                            | 22075 (12.7) | 152119 (87.3)   | Ref.                |         | Ref.                     |         |
| <b>Week &gt; 41</b>                     |              |                 |                     |         |                          |         |
| Infection                               | 446 (17.8)   | 2061 (82.2)     | 1.51 (1.36 to 1.68) | < 0.001 | 1.57 (1.41 to 1.75)      | < 0.001 |
| No infection                            | 1512(12.1)   | 11023 (87.9)    | Ref.                |         | Ref.                     |         |
| <b>Week uncertain</b>                   |              |                 |                     |         |                          |         |
| Infection                               | 23 (21.5)    | 84 (78.5)       | 2.10 (1.29 to 3.42) | 0.003   | 2.21 (1.34 to 3.65)      | 0.002   |
| No infection                            | 56 (10.4)    | 482 (89.6)      | Ref.                |         | Ref.                     |         |

<sup>1</sup> Adjusted for child's sex, maternal asthma, maternal age at delivery, year of birth, birth weight, maternal smoking, infection during first year of life, parity, and chronic lung disease

**Table 5. Respiratory infection in the first year of life subsequent asthma risk after age 10 years and after age 16 years, stratified by gestational age**

|                         | Asthma<br>n (%) | No asthma<br>n (%) | HR (95% CI)         | P Value | HR <sup>1</sup> (95% CI) | P Value |
|-------------------------|-----------------|--------------------|---------------------|---------|--------------------------|---------|
| <b>≥ Age 10</b>         |                 |                    |                     |         |                          |         |
| Gestational age (weeks) |                 |                    |                     |         |                          |         |
| ≤27                     |                 |                    |                     |         |                          |         |
| Infection               | 45 (17.9)       | 207 (82.1)         | 1.83 (1.30 to 2.57) | 0.001   | 1.99 (1.40 to 2.82)      | < 0.001 |
| No infection            | 123 (10.1)      | 1098 (89.9)        | Ref.                |         | Ref.                     |         |
| 28-31                   |                 |                    |                     |         |                          |         |
| Infection               | 116 (16.0)      | 607 (84.0)         | 1.43 (1.17 to 1.76) | 0.001   | 1.52 (1.24 to 1.87)      | < 0.001 |
| No infection            | 411 (11.5)      | 3167 (88.5)        | Ref.                |         | Ref.                     |         |
| 32-36                   |                 |                    |                     |         |                          |         |
| Infection               | 635 (16.3)      | 3271 (83.7)        | 1.39 (1.27 to 1.52) | < 0.001 | 1.46 (1.33 to 1.59)      | < 0.001 |
| No infection            | 2328 (11.)      | 17200 (88.1)       | Ref.                |         | Ref.                     |         |
| 37- 41                  |                 |                    |                     |         |                          |         |
| Infection               | 5541 (15.9)     | 29298 (84.1)       | 1.44 (1.40 to 1.48) | < 0.001 | 1.49 (1.45 to 1.54)      | < 0.001 |
| No infection            | 19637 (11.3)    | 154557 (88.7)      | Ref.                |         | Ref.                     |         |
| > 41                    |                 |                    |                     |         |                          |         |
| Infection               | 397 (15.8)      | 2119 (84.2)        | 1.51 (1.35 to 1.69) | < 0.001 | 1.57 (1.41 to 1.76)      | < 0.001 |
| No infection            | 1340 (10.7)     | 11195 (89.3)       | Ref.                |         | Ref.                     |         |
| Uncertain               |                 |                    |                     |         |                          |         |
| Infection               | 19 (17.8)       | 88 (82.2)          | 1.93 (1.14 to 3.28) | 0.015   | 2.05 (1.19 to 3.55)      | 0.010   |
| No infection            | 50 (9.3)        | 488 (90.7)         | Ref.                |         | Ref.                     |         |
| <b>≥ Age 16</b>         |                 |                    |                     |         |                          |         |
| Gestational age (weeks) |                 |                    |                     |         |                          |         |
| ≤27                     |                 |                    |                     |         |                          |         |
| Infection               | 22 (8.8)        | 227 (91.2)         | 1.56 (0.96 to 2.52) | 0.071   | 1.65 (1.01 to 2.71)      | 0.047   |
| No infection            | 69 (5.7)        | 1132 (94.3)        | Ref.                |         | Ref.                     |         |
| 28-31                   |                 |                    |                     |         |                          |         |
| Infection               | 65 (9.2)        | 638 (90.8)         | 1.41 (1.07 to 1.86) | 0.014   | 1.45 (1.10 to 1.91)      | 0.009   |
| No infection            | 233 (6.7)       | 3249 (93.3)        | Ref.                |         | Ref.                     |         |
| 32-36                   |                 |                    |                     |         |                          |         |
| Infection               | 396 (10.5)      | 3362 (89.5)        | 1.43 (1.28 to 1.60) | < 0.001 | 1.49 (1.34 to 1.68)      | < 0.001 |
| No infection            | 1410 (7.5)      | 17379 (92.5)       | Ref.                |         | Ref.                     |         |
| 37- 41                  |                 |                    |                     |         |                          |         |
| Infection               | 3227 (9.7)      | 30040 (90.3)       | 1.37 (1.32 to 1.42) | < 0.001 | 1.42 (1.37 to 1.48)      | < 0.001 |
| No infection            | 11987 (7.2)     | 154347 (92.8)      | Ref.                |         | Ref.                     |         |
| > 41                    |                 |                    |                     |         |                          |         |
| Infection               | 248 (10.3)      | 2161 (89.7)        | 1.58 (1.37 to 1.82) | < 0.001 | 1.64 (1.42 to 1.90)      | < 0.001 |
| No infection            | 801 (6.7)       | 11244 (93.3)       | Ref.                |         | Ref.                     |         |
| Uncertain               |                 |                    |                     |         |                          |         |
| Infection               | 16 (15.2)       | 89 (84.8)          | 2.48 (1.37 to 4.51) | 0.003   | 2.72 (1.47 to 5.04)      | 0.002   |
| No infection            | 33 (6.2)        | 496 (93.8)         | Ref.                |         | Ref.                     |         |

<sup>1</sup> Adjusted for child's sex, maternal asthma, maternal age at delivery, year of birth, maternal smoking, birth weight, infection during first year of life, parity, and chronic lung disease.

STROBE 2007 (v4) Statement—Checklist of items that should be included in reports of *cohort studies*

| Section/Topic                | Item # | Recommendation                                                                                                                                                                       | Reported on page # |
|------------------------------|--------|--------------------------------------------------------------------------------------------------------------------------------------------------------------------------------------|--------------------|
| Title and abstract           | 1      | (a) Indicate the study's design with a commonly used term in the title or the abstract                                                                                               | 1                  |
|                              |        | (b) Provide in the abstract an informative and balanced summary of what was done and what was found                                                                                  | 2                  |
| <b>Introduction</b>          |        |                                                                                                                                                                                      |                    |
| Background/rationale         | 2      | Explain the scientific background and rationale for the investigation being reported                                                                                                 | 3                  |
| Objectives                   | 3      | State specific objectives, including any prespecified hypotheses                                                                                                                     | 3                  |
| <b>Methods</b>               |        |                                                                                                                                                                                      |                    |
| Study design                 | 4      | Present key elements of study design early in the paper                                                                                                                              | 4                  |
| Setting                      | 5      | Describe the setting, locations, and relevant dates, including periods of recruitment, exposure, follow-up, and data collection                                                      | 4-5                |
| Participants                 | 6      | (a) Give the eligibility criteria, and the sources and methods of selection of participants. Describe methods of follow-up                                                           | 4-5                |
|                              |        | (b) For matched studies, give matching criteria and number of exposed and unexposed                                                                                                  | 4                  |
| Variables                    | 7      | Clearly define all outcomes, exposures, predictors, potential confounders, and effect modifiers. Give diagnostic criteria, if applicable                                             | 4-6                |
| Data sources/<br>measurement | 8*     | For each variable of interest, give sources of data and details of methods of assessment (measurement). Describe comparability of assessment methods if there is more than one group | 4-5                |
| Bias                         | 9      | Describe any efforts to address potential sources of bias                                                                                                                            | 4-6                |
| Study size                   | 10     | Explain how the study size was arrived at                                                                                                                                            | 4                  |
| Quantitative variables       | 11     | Explain how quantitative variables were handled in the analyses. If applicable, describe which groupings were chosen and why                                                         | 5-6, 16            |

|                     |     |                                                                                                                                                                                                              |            |
|---------------------|-----|--------------------------------------------------------------------------------------------------------------------------------------------------------------------------------------------------------------|------------|
| Statistical methods | 12  | (a) Describe all statistical methods, including those used to control for confounding                                                                                                                        | 5-6        |
|                     |     | (b) Describe any methods used to examine subgroups and interactions                                                                                                                                          | 5-6        |
|                     |     | (c) Explain how missing data were addressed                                                                                                                                                                  | 7          |
|                     |     | (d) If applicable, explain how loss to follow-up was addressed                                                                                                                                               | 5-6        |
|                     |     | (e) Describe any sensitivity analyses                                                                                                                                                                        | 6-7        |
| <b>Results</b>      |     |                                                                                                                                                                                                              |            |
| Participants        | 13* | (a) Report numbers of individuals at each stage of study—eg numbers potentially eligible, examined for eligibility, confirmed eligible, included in the study, completing follow-up, and analysed            | 4          |
|                     |     | (b) Give reasons for non-participation at each stage                                                                                                                                                         | 4          |
|                     |     | (c) Consider use of a flow diagram                                                                                                                                                                           |            |
| Descriptive data    | 14* | (a) Give characteristics of study participants (eg demographic, clinical, social) and information on exposures and potential confounders                                                                     | 6-7, 16    |
|                     |     | (b) Indicate number of participants with missing data for each variable of interest                                                                                                                          | 5-7, 16    |
|                     |     | (c) Summarise follow-up time (eg, average and total amount)                                                                                                                                                  | 4          |
| Outcome data        | 15* | Report numbers of outcome events or summary measures over time                                                                                                                                               |            |
| Main results        | 16  | (a) Give unadjusted estimates and, if applicable, confounder-adjusted estimates and their precision (eg, 95% confidence interval). Make clear which confounders were adjusted for and why they were included | 6-7, 16-19 |
|                     |     | (b) Report category boundaries when continuous variables were categorized                                                                                                                                    | 16-17      |
|                     |     | (c) If relevant, consider translating estimates of relative risk into absolute risk for a meaningful time period                                                                                             |            |
| Other analyses      | 17  | Report other analyses done—eg analyses of subgroups and interactions, and sensitivity analyses                                                                                                               | 5-7, 17-19 |

|                          |    |                                                                                                                                                                            |      |
|--------------------------|----|----------------------------------------------------------------------------------------------------------------------------------------------------------------------------|------|
| <b>Discussion</b>        |    |                                                                                                                                                                            |      |
| Key results              | 18 | Summarise key results with reference to study objectives                                                                                                                   | 7-8  |
| <b>Limitations</b>       |    |                                                                                                                                                                            |      |
| Interpretation           | 20 | Give a cautious overall interpretation of results considering objectives, limitations, multiplicity of analyses, results from similar studies, and other relevant evidence | 8-11 |
| Generalisability         | 21 | Discuss the generalisability (external validity) of the study results                                                                                                      | 11   |
| <b>Other information</b> |    |                                                                                                                                                                            |      |
| Funding                  | 22 | Give the source of funding and the role of the funders for the present study and, if applicable, for the original study on which the present article is based              | 1    |

\*Give information separately for cases and controls in case-control studies and, if applicable, for exposed and unexposed groups in cohort and cross-sectional studies.

**Note:** An Explanation and Elaboration article discusses each checklist item and gives methodological background and published examples of transparent reporting. The STROBE checklist is best used in conjunction with this article (freely available on the Web sites of PLoS Medicine at <http://www.plosmedicine.org/>, Annals of Internal Medicine at <http://www.annals.org/>, and Epidemiology at <http://www.epidem.com/>). Information on the STROBE Initiative is available at [www.strobe-statement.org](http://www.strobe-statement.org).
